# Supplementary material for: Phase transitions and spectral shifts: a quantum mechanical exploration of vibrational frequency in magnesium ferrite
Source: Royal Society of Chemistry journal article supplement (doi:10.1039/d3ra07339d), 2024-01-01
Supplement: d3ra07339d1.pdf [file d3ra07339d1.pdf]

## Phase Transitions and Spectral Shifts: A Quantum Mechanical Exploration of Vibrational Frequency in Magnesium Ferrite

COORDINATES IN THE CRYSTALLOGRAPHIC CELL FOR ALL  $(\text{Mg}_{1-x}\text{Fe}_x)[\text{Mg}_x\text{Fe}_{2-x}\text{O}_4]$  SYSTEMS STUDIED.

FM (X=0.0)

|    | ATOMS | X/A       | Y/B       | Z/C       |
|----|-------|-----------|-----------|-----------|
| 8  | O     | 2.60E-01  | -2.40E-01 | -2.40E-01 |
| 8  | O     | -1.00E-02 | -1.00E-02 | 2.60E-01  |
| 8  | O     | 2.60E-01  | -1.00E-02 | -1.00E-02 |
| 8  | O     | -1.00E-02 | 2.60E-01  | -1.00E-02 |
| 8  | O     | 2.40E-01  | 2.40E-01  | -2.60E-01 |
| 8  | O     | 1.00E-02  | 1.00E-02  | -2.60E-01 |
| 8  | O     | 1.00E-02  | -2.60E-01 | 1.00E-02  |
| 8  | O     | -2.60E-01 | 1.00E-02  | 1.00E-02  |
| 12 | MG    | 1.25E-01  | 1.25E-01  | 1.25E-01  |
| 12 | MG    | -1.25E-01 | -1.25E-01 | -1.25E-01 |
| 26 | FE    | -5.00E-01 | -5.00E-01 | -5.00E-01 |
| 26 | FE    | 2.50E-01  | 2.50E-01  | -5.00E-01 |
| 26 | FE    | -5.00E-01 | 2.50E-01  | 2.50E-01  |
| 26 | FE    | 2.50E-01  | -5.00E-01 | 2.50E-01  |

AFM (X=0.0)

|    | ATOMS | X/A       | Y/B       | Z/C       |
|----|-------|-----------|-----------|-----------|
| 8  | O     | 2.60E-01  | -2.40E-01 | -2.39E-01 |
| 8  | O     | -1.02E-02 | -1.02E-02 | 2.61E-01  |
| 8  | O     | 2.60E-01  | -1.02E-02 | -1.11E-02 |
| 8  | O     | -1.02E-02 | 2.60E-01  | -1.11E-02 |
| 8  | O     | 2.40E-01  | 2.40E-01  | -2.61E-01 |
| 8  | O     | 1.02E-02  | 1.02E-02  | -2.61E-01 |
| 8  | O     | 1.02E-02  | -2.60E-01 | 1.11E-02  |
| 8  | O     | -2.60E-01 | 1.02E-02  | 1.11E-02  |
| 12 | MG    | 1.25E-01  | 1.25E-01  | 1.25E-01  |
| 12 | MG    | -1.25E-01 | -1.25E-01 | -1.25E-01 |
| 26 | FE    | -5.00E-01 | -5.00E-01 | -5.00E-01 |
| 26 | FE    | 2.50E-01  | 2.50E-01  | -5.00E-01 |
| 26 | FE    | -5.00E-01 | 2.50E-01  | 2.50E-01  |
| 26 | FE    | 2.50E-01  | -5.00E-01 | 2.50E-01  |

FM (X=0.5)

|    | ATOMS | X/A       | Y/B       | Z/C       |
|----|-------|-----------|-----------|-----------|
| 8  | O     | 2.58E-01  | -2.42E-01 | -2.42E-01 |
| 8  | O     | -1.24E-02 | -1.24E-02 | 2.56E-01  |
| 8  | O     | 2.56E-01  | -1.24E-02 | -1.24E-02 |
| 8  | O     | -1.24E-02 | 2.56E-01  | -1.24E-02 |
| 8  | O     | 2.44E-01  | 2.44E-01  | -2.56E-01 |
| 8  | O     | 8.01E-03  | 8.01E-03  | -2.55E-01 |
| 8  | O     | 8.01E-03  | -2.55E-01 | 8.01E-03  |
| 8  | O     | -2.55E-01 | 8.01E-03  | 8.01E-03  |
| 12 | MG    | 1.23E-01  | 1.23E-01  | 1.23E-01  |
| 26 | FE    | -1.22E-01 | -1.22E-01 | -1.22E-01 |
| 12 | MG    | 5.00E-01  | 5.00E-01  | 5.00E-01  |
| 26 | FE    | 2.53E-01  | 2.53E-01  | 4.98E-01  |
| 26 | FE    | 4.98E-01  | 2.53E-01  | 2.53E-01  |
| 26 | FE    | 2.53E-01  | 4.98E-01  | 2.53E-01  |

AFM (0.5)

|    | ATOMS | X/A       | Y/B       | Z/C       |
|----|-------|-----------|-----------|-----------|
| 8  | O     | 2.58E-01  | -2.42E-01 | -2.42E-01 |
| 8  | O     | -1.32E-02 | -1.34E-02 | 2.56E-01  |
| 8  | O     | 2.56E-01  | -1.34E-02 | -1.32E-02 |
| 8  | O     | -1.20E-02 | 2.56E-01  | -1.20E-02 |
| 8  | O     | 2.44E-01  | 2.46E-01  | -2.56E-01 |
| 8  | O     | 8.13E-03  | 1.05E-02  | -2.54E-01 |
| 8  | O     | 7.68E-03  | -2.53E-01 | 7.68E-03  |
| 8  | O     | -2.54E-01 | 1.05E-02  | 8.13E-03  |
| 12 | MG    | 1.23E-01  | 1.22E-01  | 1.23E-01  |
| 26 | FE    | -1.22E-01 | -1.23E-01 | -1.22E-01 |
| 12 | MG    | 5.00E-01  | 4.99E-01  | 5.00E-01  |
| 26 | FE    | 2.53E-01  | 2.51E-01  | 4.99E-01  |
| 26 | FE    | 4.99E-01  | 2.51E-01  | 2.53E-01  |
| 26 | FE    | 2.54E-01  | 4.97E-01  | 2.54E-01  |

FM (X=1.0)

|    | ATOMS | X/A       | Y/B       | Z/C       |
|----|-------|-----------|-----------|-----------|
| 8  | O     | 2.58E-01  | -2.42E-01 | -2.46E-01 |
| 8  | O     | -7.61E-03 | -7.61E-03 | 2.54E-01  |
| 8  | O     | 2.55E-01  | -5.10E-03 | -1.03E-02 |
| 8  | O     | -5.10E-03 | 2.55E-01  | -1.03E-02 |
| 8  | O     | 2.42E-01  | 2.42E-01  | -2.54E-01 |
| 8  | O     | 7.61E-03  | 7.61E-03  | -2.54E-01 |
| 8  | O     | 5.10E-03  | -2.55E-01 | 1.03E-02  |
| 8  | O     | -2.55E-01 | 5.10E-03  | 1.03E-02  |
| 26 | FE    | 1.25E-01  | 1.25E-01  | 1.19E-01  |
| 26 | FE    | -1.25E-01 | -1.25E-01 | -1.19E-01 |
| 12 | MG    | -5.00E-01 | 5.00E-01  | -5.00E-01 |
| 12 | MG    | 2.50E-01  | 2.50E-01  | -5.00E-01 |
| 26 | FE    | -5.00E-01 | 2.50E-01  | 2.50E-01  |
| 26 | FE    | 2.50E-01  | -5.00E-01 | 2.50E-01  |

AFM (X=1.0)

|    |    | X/A       | Y/B       | Z/C       |
|----|----|-----------|-----------|-----------|
| 8  | O  | 2.56E-01  | -2.41E-01 | -2.47E-01 |
| 8  | O  | -8.87E-03 | -6.21E-03 | 2.53E-01  |
| 8  | O  | 2.54E-01  | -4.12E-03 | -1.14E-02 |
| 8  | O  | -5.91E-03 | 2.56E-01  | -1.05E-02 |
| 8  | O  | 2.41E-01  | 2.44E-01  | -2.53E-01 |
| 8  | O  | 6.19E-03  | 8.89E-03  | -2.53E-01 |
| 8  | O  | 4.12E-03  | -2.54E-01 | 1.14E-02  |
| 8  | O  | -2.56E-01 | 5.92E-03  | 1.06E-02  |
| 26 | FE | 1.25E-01  | 1.25E-01  | 1.19E-01  |
| 26 | FE | -1.25E-01 | -1.25E-01 | -1.19E-01 |
| 12 | MG | -4.99E-01 | 4.99E-01  | -5.00E-01 |
| 12 | MG | 2.51E-01  | 2.49E-01  | -5.00E-01 |
| 26 | FE | -4.97E-01 | 2.47E-01  | 2.49E-01  |
| 26 | FE | 2.53E-01  | 4.97E-01  | 2.51E-01  |
